# Supplementary material
Source: MDPI journal article supplement (https://www.mdpi.com/2073-4433/10/12/765)

**Supplementary Figure S1.** Linear regression analysis of NDVI from 1982-2015 for all 12 months, starting with January (top, left) and February (top, right) then proceeding downwards. The dotted rectangle represents the domain of the study region.

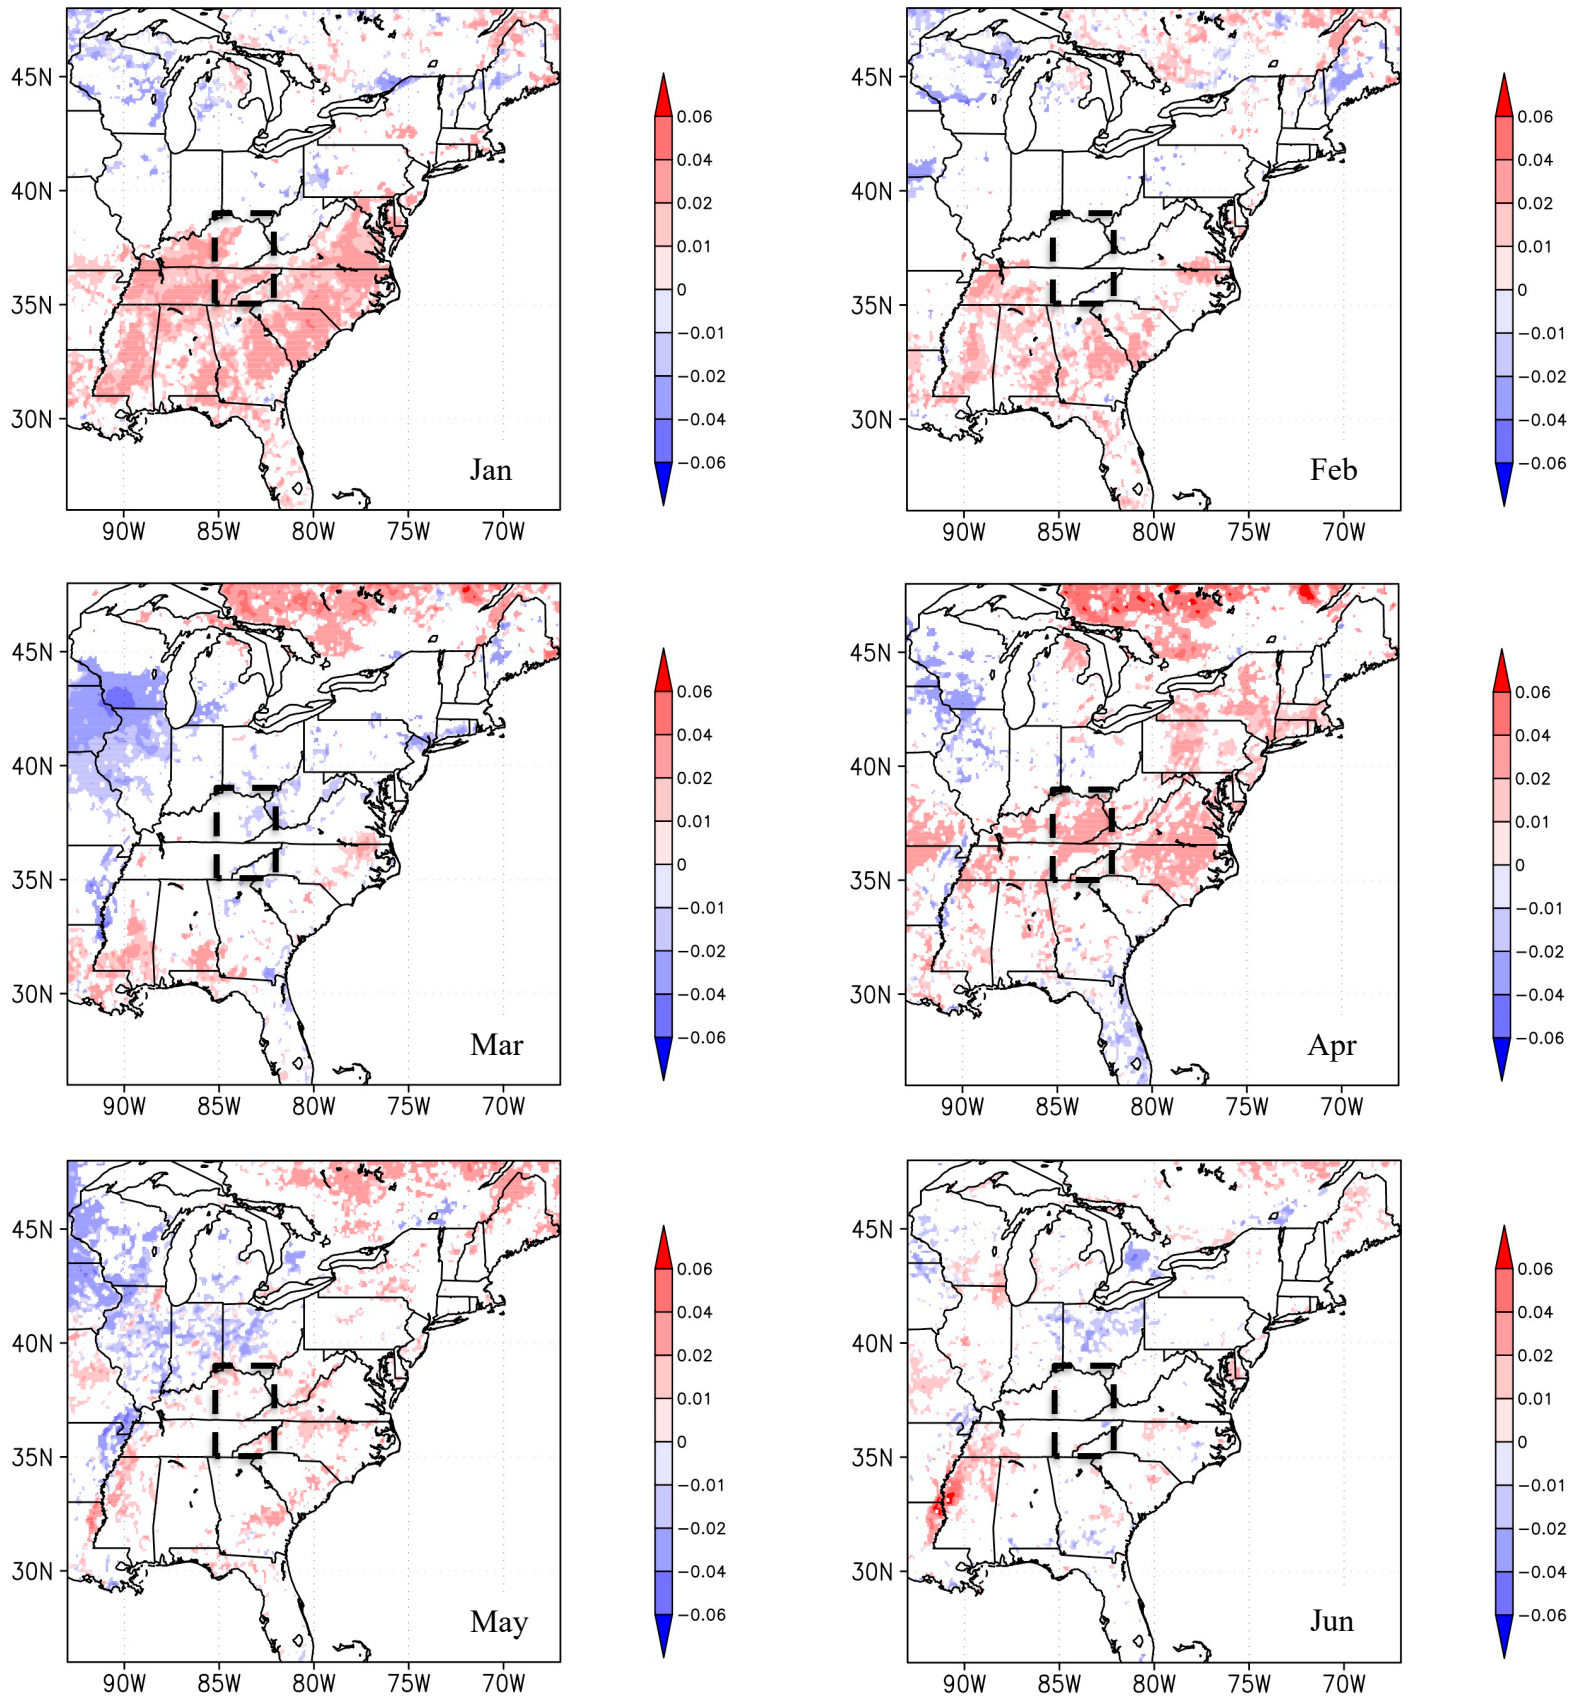

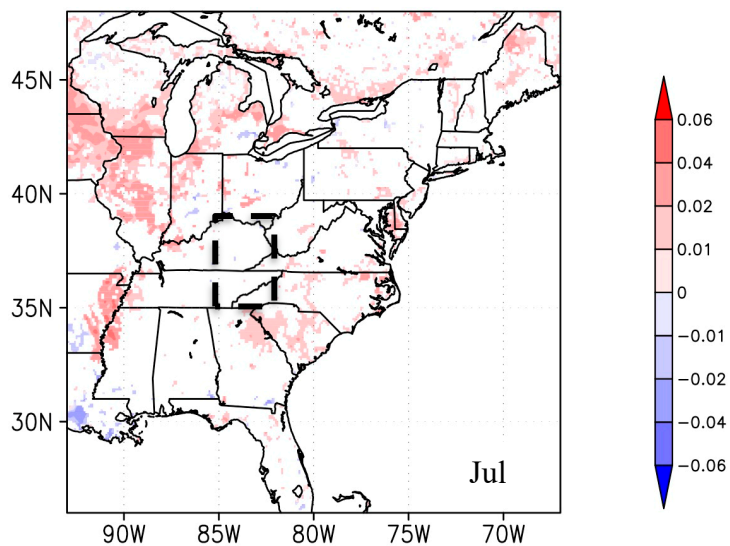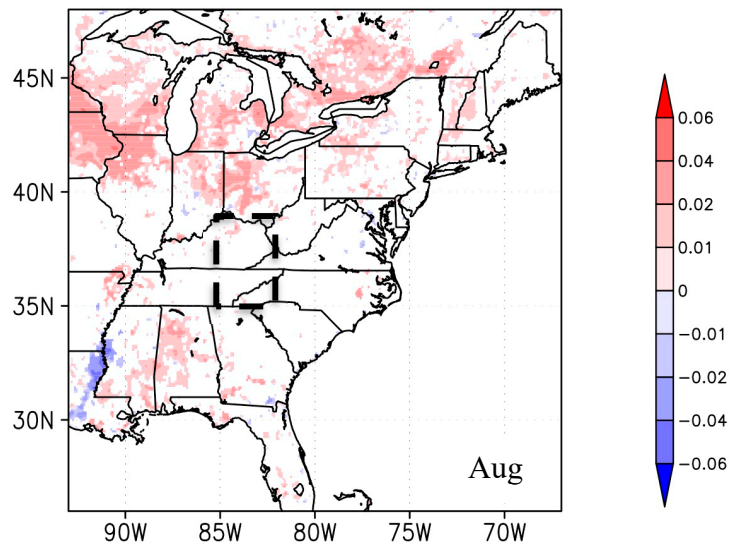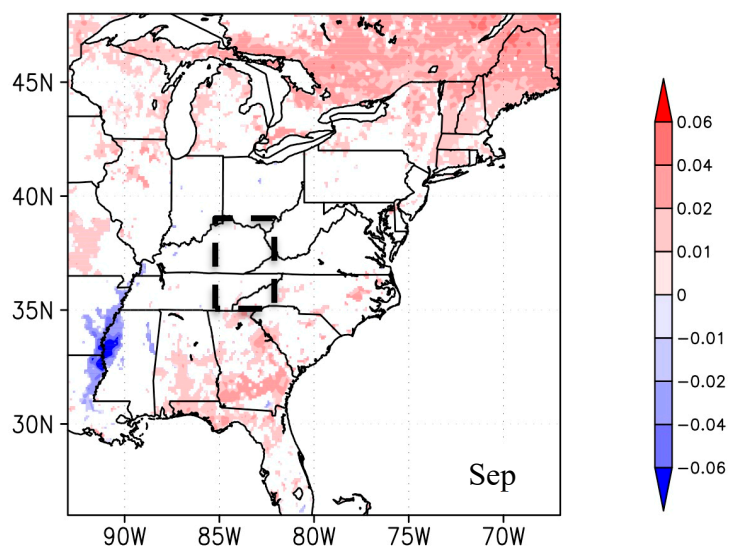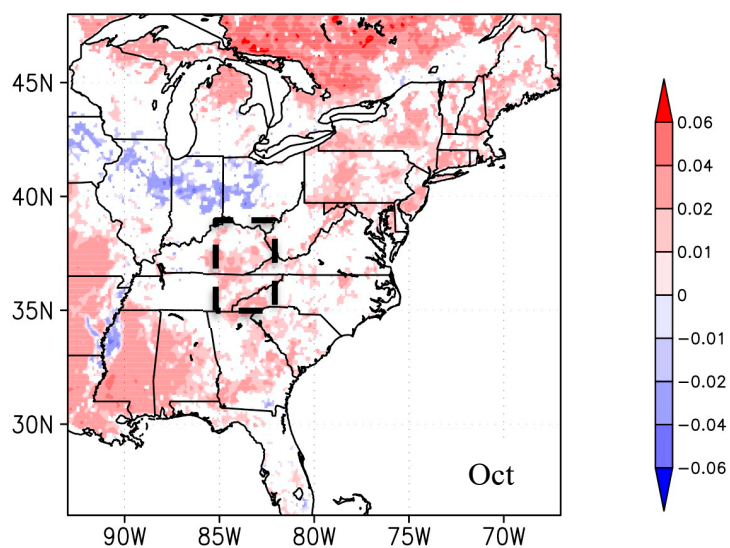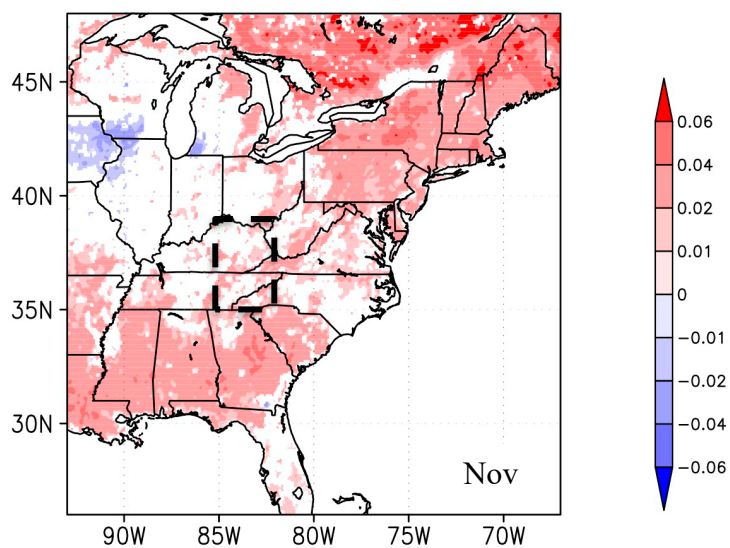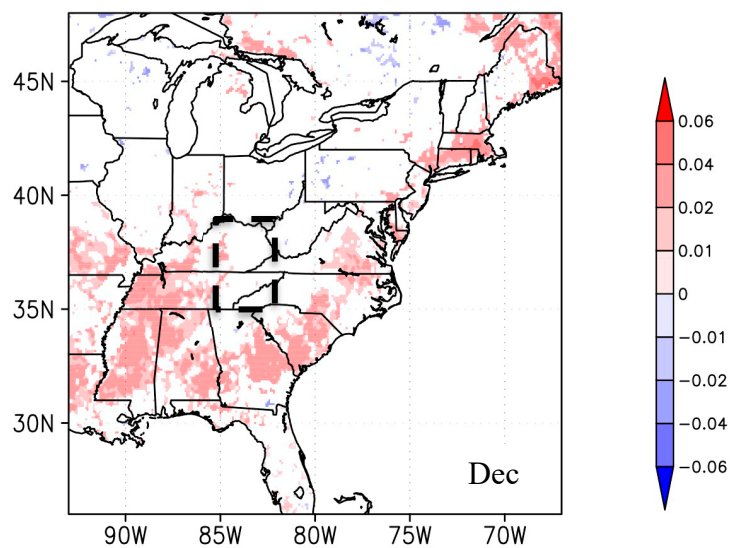



**Supplementary Figure S2.** Detrended composite analysis of GridMET precipitation (mm/month) between 9 years of high/low NDVI. The dotted rectangle represents the domain of the study region.

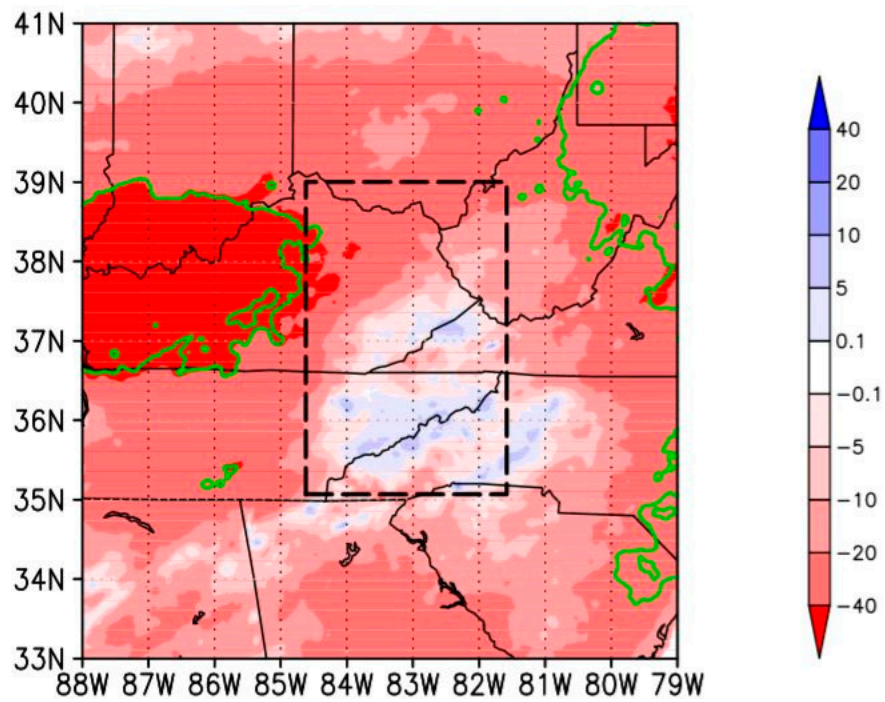

Supplement: s1 [file s1]
